# Supplementary material
Source: MDPI journal article supplement (https://www.mdpi.com/2073-4395/13/6/1486)
Supplement: s1 [file s1]

## The 16S RNA gene sequence of *B. subtilis* GE1

TGCAGTCGAGCGGACAGATGGGAGCTTGCTCCCTGATGTTAGCGGCGGACGGGTGAGTAACAC  
GTGGGTAACTGCCTGTAAGACTGGGATAACTCCGGGAAACCGGGGCTAATACCGGATGGTTG  
TTTGAACCGCATGGTTCAAACATAAAAGGTGGCTTCGGCTACCACTTACAGATGGACCCGCGGC  
GCATTAGCTAGTTGGTGAGGTAACGGCTCACCAAGGCAACGATGCGTAGCCGACCTGAGAGGG  
TGATCGGCCACACTGGGACTGAGACACGGCCCAGACTCCTACGGGAGGCAGCAGTAGGGAAT  
CTTCCGCAATGGACGAAAGTCTGACGGAGCAACGCCGCGTGAGTGATGAAGGTTTTTCGGATCG  
TAAAGCTCTGTTGTTAGGGAAGAACAAGTACCGTTCGAATAGGGCGGTACCTTGACGGTACCTA  
ACCAGAAAGCCACGGCTAACTACGTGCCAGCAGCCGCGGTAATACGTAGGTGGCAAGCGTTGT  
CCGGAATTATTGGGCGTAAAGGGCTCGCAGGCGGTTTTCTTAAGTCTGATGTGAAAGCCCCCGGC  
TCAACCGGGGAGGGTCATTGGAACTGGGGAACTTGAGTGCAGAAGAGGAGAGTGGAATTCC  
ACGTGTAGCGGTGAAATGCGTAGAGATGTGGAGGAACACCAGTGGCGAAGGCGACTCTCTGGT  
CTGTAAGTACGCTGAGGAGCGAAAGCGTGGGGAGCGAACAGGATTAGATACCCTGGTAGTCC  
ACGCCGTAAACGATGAGTGCTAAGTGTTAGGGGGTTTTCCGCCCTTAGTGCTGCAGCTAACGCA  
TTAAGCACTCCGCCTGGGGAGTACGGTCGCAAGACTGAACTCAAAGGAATTGACGGGGGCC  
CGCACAAGCGGTGGAGCATGTGGTTTAATTCGAAGCAACGCGAAGAACCTTACCAGGTCTTGA  
CATCCTCTGACAATCCTAGAGATAGGACGTCCCCTTCGGGGGCAGAGTGACAGGTGGTGCATG  
GTTGTCGTCAGCTCGTGTCTGAGATGTTGGGTAAAGTCCCGCAACGAGCGCAACCCTTGATCT  
TAGTTGCCAGCATTCAGTTGGGCACTCTAAGGTGACTGCCGGTGACAAACCGGAGGAAGGTGG  
GGATGACGTCAAATCATCATGCCCTTATGACCTGGGCTACACACGTGCTACAATGGACAGAAC  
AAAGGGCAGCGAAACCGCGAGGTTAAGCCAATCCCACAAATCTGTTCTCAGTTCGGATCGCAG  
TCTGCAACTCGACTGCGTGAAGCTGGAATCGCTAGTAATCGCGGATCAGCATGCCGCGGTGAAT  
ACGTTCCCGGGCCTTGTACACACCGCCCGTCACACCACGAGAGTTTGTAACACCCGAAGTCGG  
TGAGGTAACCTTTTAGGAGCCAGCCGCCGAA

## The 16S RNA gene sequence of *Pseudomonas* sp. X123

TTTTGAGAGT TTTGGTCCTG GCTCAGATTG AACGCTGGCG GCAGGCCTAA CACATGCAAG  
TCGAGCGGTA GAGAGGTGCT TGCACCTCTT GAGAGCGGCG GACGGGTGAG TAATGCCTAG  
GAATCTGCCT GGTAGTGGGG GATAACGCTC GGAAACGGAC GCTAATACCG CATACGTCCT  
ACGGGAGAAA GCAGGGGACC TTCGGGCCTT GCGCTATCAG ATGAGCCTAG GTCGGATTAG  
CTAGTTGGTG AGGTAATGGC TCACCAAGGC GACGATCCGT AACTGGTCTG AGAGGATGAT  
CAGTCACACT GGAAGTGA GA CACGGTCCAG ACTCCTACGG GAGGCAGCAG TGGGGAATAT  
TGGACAATGG GCGAAAGCCT GATCCAGCCA TGCCGCGTGT GTGAAGAAGG TCTTCGGATT  
GTAAAGCACT TTAAGTTGGG AGGAAGGGCA TTAACCTAAT ACGTTAGTGT TTTGACGTTA  
CCGACAGAAT AAGCACCGGC TAACTCTGTG CCAGCAGCCG CGGTAATACA GAGGGTGCAA  
GCGTTAATCG GAATTACTGG GCGTAAAGCG CGCGTAGGTG GTTCGTTAAG TTGGATGTGA  
AAGCCCCGGG CTCAACCTGG GAACTGCATT CAAAAGTGTG GAGCTAGAGT ATGGTAGAGG  
GTGGTGAAT TTCCTGTGTA GCGGTGAAAT GCGTAGATAT AGGAAGGAAC ACCAGTGGCG  
AAGGCGACCA CCTGGACTGA TACTGACACT GAGGTGCGAA AGCGTGGGGA GCAAACAGGA  
TTAGATACCC TGGTAGTCCA CGCCGTAAAC GATGTCAACT AGCCGTTGGG AGCCTTGAGC  
TCTTAGTGGC GCAGCTAACG CATTAAGTTG ACCGCCTGGG GAGTACGGCC GCAAGGTAA  
AACTCAAATG AATTGACGGG GGCCCGCACA AGCGGTGGAG CATGTGGTTT AATTCGAAGC  
AACGCGAAGA ACCTTACCAG GCCTTGACAT CCAATGAACT TTCCAGAGAT GGATTGGTGC  
CTTCGGGAGC ATTGAGACAG GTGCTGCATG GCTGTCGTCA GCTCGTGTCG TGAGATGTTG  
GGTTAAGTCC CGTAACGAGC GCAACCCTTG TCCTTAGTTA CCAGCACGTT ATGGTGGGCA  
CTCTAAGGAG ACTGCCGGTG ACAAACCGGA GGAAGGTGGG GATGACGTCA AGTCATCATG  
GCCCTTACGG CCTGGGCTAC ACACGTGCTA CAATGGTCGG TACAGAGGGT TGCCAAGCCG  
CGAGGTGGAG CTAATCCAC AAAACCGATC GTAGTCCGGA TCGCAGTCTG CAACTCGACT  
GCGTGAAGTC GGAATCGCTA GTAATCGCGA ATCAGAATGT CGCGGTGAAT ACGTTCCCGG  
GCCTTGATACA CACCGCCCGT CACACCATGG GAGTGGGTTG CACCAGAAGT AGCTAGTCTA  
ACCTTCGGGG GGACGGTTAC CAACCGGGTG GATTCAGAAA GGT
